# Supplementary material for: Association Between the Level of Plasma B-type Natriuretic Peptide and in-hospital Mortality in Patients With Acute Exacerbation of COPD&nbsp;Without a History of Coronary Ischemic Heart Disease: A Retrospective Study
Source: Research Square preprint supplement (doi:10.21203/rs.3.rs-135746/v1), 2020-12-29
Supplement: Supplementary file 1 [file d06a8e5f59d09cabe3235c4d.csv]

Table 3. Hazard ratios for log2BNP and in-hospital mortality, composite of in-hospital mortality or invasive ventilation, invasive ventilation
	No. (%)	Unadjusted model	Age-and sex-adjusted model	Fully adjusted model*
		HR (95% CI) P-value	HR (95% CI) P-value	HR (95% CI) P-value
Primary outcome
In-hospital mortality	16(5.33)	1.85 (1.39, 2.47) <0.001	2.00 (1.44, 2.77) <0.001	2.44(1.43, 4.14) 0.001
Secondary outcomes
Mortality or invasive ventilation	32 (10.67)	1.42(1.19, 1.71) <0.001	1.47(1.22, 1.78) <0.001	1.36(1.07, 1.74) 0.013
Invasive ventilation	29 (9.67)	1.48(1.22, 1.80) <0.001	1.53(1.25, 1.88) <0.001	1.45(1.11, 1.88) 0.006
*fully adjusted model (primary outcome) includes the following covariates: age, sex, smoking status, drinking status, past medical history, CURB65, PaO2, PaCO2.
*fully adjusted model (secondary outcomes) includes the following covariates: age, sex, smoking status, drinking status, past medical history, CURB65, neutrophil count, D-dimer, PaO2, PaCO2.
